# Supplementary material for: Synthesis, nanostructure evaluation and tunable anomalous 3D hopping transport of manganese ferrite encapsulated poly[3,4-(ethylenedioxy)thiophene] decorated graphene layer
Source: Royal Society of Chemistry journal article supplement (doi:10.1039/c5ra01904d), 2015-01-01
Supplement: c5ra01904d1.pdf [file c5ra01904d1.pdf]

Supporting Information

**Synthesis, nanostructure evaluation and tunable anomalous 3D hopping transport of manganese ferrite encapsulated poly [3,4-(ethylenedioxy) thiophene] decorated graphene layer**

**Debabrata Nandi<sup>a\*</sup>, Arjun Maity<sup>b,c\*</sup>**

<sup>a</sup> *Department of Chemistry, Presidency University, Kolkata 700073, India.*

<sup>b</sup> *Department of Civil and Chemical Engineering, University of South Africa (UNISA), South Africa.*

<sup>c</sup> *DST/ CSIR NCNSM, Materials Science and Manufacturing, Pretoria, South Africa.*

---

---

\*Corresponding author E-Mail: [nandidebabrata87@gmail.com](mailto:nandidebabrata87@gmail.com) (D.N), [amaity@csir.co.za](mailto:amaity@csir.co.za) (A.M.) Phone: +2712 841 7845, Fax: +2712 841 3553

## Chemicals and Analytical tools

Graphite flake (Alfa Aesar, England) used for reduced graphene oxide synthesis. The other chemicals such as hydrazine hydrate ( $\text{N}_2\text{H}_4 \cdot \text{H}_2\text{O}$ ), ammonium ferric sulphate hexahydrate ( $(\text{NH}_4)_2\text{Fe}(\text{SO}_4)_2 \cdot 6\text{H}_2\text{O}$ ), Dodecyl Benzene Sulphonic Acid (DBSA), potassium permanganate ( $\text{KMnO}_4$ ), Manganous chloride hexahydrate ( $\text{MnCl}_2 \cdot 6\text{H}_2\text{O}$ ), ferric chloride hexa hydrate ( $\text{FeCl}_3 \cdot 6\text{H}_2\text{O}$ ), 3,4-ethylenedioxythiophene (EDOT) used were purchased from Sigma-Aldrich, USA. EDOT was used after distillation. Analytical tools utilized are mentioned in supporting information (S) section.

The powder X-ray diffraction (XRD) patterns of samples were taken using an X-ray diffractometer (Philips Analytical PW-1710) equipped with Cu  $\text{K}\alpha$  radiation at a scanning speed  $0.4^\circ \text{ minute}^{-1}$  between the angle  $10^\circ$  and  $70^\circ$  operated at voltage 40 kV and applied potential current 30mA. Raman scattering measurements were performed in the back scattering configuration using micro-Raman Jobin Yvon T64000 system to establish the bond formation among different species. Scanning electron microscopic (SEM) (Tescan Vega, U.K.; model LSU+) images were recorded for the sample by mounting on copper grids. Transmission electron micrographs (TEM) were recorded on a H800 transmission electron micrograph operated at 200 kV. The sample for the TEM was dispersed in isopropanol by sonication, and the drop cast onto 200 meshes copper grids coated with a holey carbon film. Atomic force microscopic (AFM) images were recorded on a commercial Nanoscope-III (Digital Instruments, Santa Barbara, CA) using optical beam deflection to monitor the displacement of a micro fabricated silicon cantilever having a spring constant of  $80 \text{ N.m}^{-1}$ .

## Figure file

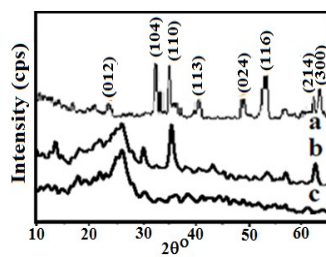

Fig. S1. XRD pattern of (a) IMO, (b) NIPG, and (c) PEDOT.

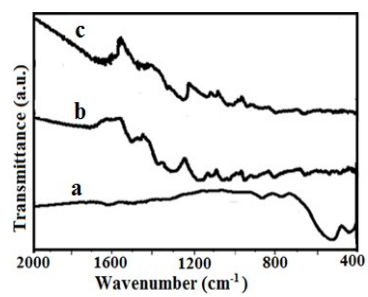

Fig. S2. FT-IR spectra of (a) IMO, (b) PEDOT, and (c) NIPG.

## Table file

**Table S1**

Measured electrical conductivity ( $\sigma/\text{S}\cdot\text{cm}^{-1}$ ) of PEDOT based material at 50 and 300K with conductivity ratio( $r=\sigma_{300\text{ K}} / \sigma_{50\text{ K}}$ ).

|    | IMO-PEDOT |      |          | GR-PEDOT |      |          | NIPG  |       |          |
|----|-----------|------|----------|----------|------|----------|-------|-------|----------|
|    | 300K      | 50K  | <i>r</i> | 300K     | 50K  | <i>r</i> | 300K  | 50K   | <i>r</i> |
| P1 | 0.48      | 0.01 | 31.0     | 0.96     | 0.02 | 48.0     | 22.85 | 0.28  | 81.6     |
| P2 | 0.54      | 0.03 | 18.0     | 8.45     | 0.21 | 40.2     | 40.92 | 1.35  | 30.3     |
| P3 | 0.87      | 0.08 | 10.8     | 31.19    | 0.94 | 33.1     | 65.33 | 4.31  | 15.1     |
| P4 | 1.16      | 0.12 | 9.6      | 52.75    | 1.88 | 28.0     | 98.52 | 11.02 | 8.9      |
